# Supplementary material for: Frequent Unanticipated Alleles of lethal giant larvae in Drosophila Second Chromosome Stocks
Source: Oxford University Press journal article supplement (doi:10.1534/genetics.109.101808), 2009-03-12
Supplement: 101808_si.pdf [file 101808_si.pdf]

# GENETICS

## Supporting Information

<http://www.genetics.org/cgi/content/full/genetics.109.101808/DC1>

## Note

### Frequent Unanticipated Alleles of *lethal giant larvae* in *Drosophila* Second Chromosome Stocks

Fabrice Roegiers, Joshua Kavalier, Nicholas Tolwinski, Yu-Ting Chou, Hong Duan, Fernando Bejarano,  
Diana Zitserman and Eric C. Lai

Copyright © 2009 by the Genetics Society of America  
DOI: 10.1534/genetics.109.101808

**FILE S1****Supplemental Experimental Procedures***Bloomington deficiency screening*

We stained collections of Bloomington embryos with rabbit anti-Miranda (gift of Fumio Matsuzaki) and identified stocks with Mendelian segregation of delocalized Miranda in neuroblasts. We subsequently tested the entire current 2nd chromosome collection (DK2) for failure to complement *lgl[4]*.

*Bruinfly FRT-P lethal screening*

We induced germline clones in *hs-FLP/+; P lethal FRT40A/ovo[D], FRT40A* females by heat-shocking for 1 hr at 38°C during the first instar. We mated these to sibling males and prepared cuticles from 16-24 hr embryos, which were scored for the presence of epithelial patterning defects. We subsequently tested 4-10 individual flies from 24 randomly selected Bruinfly stocks for failure to complement *lgl[4]*.

*Analysis of insensitive*

We analyzed thorax clones in *Ubx-FLP/+; insv [23B]* (or *insv[23L]*), *FRT40A/ubi-GFP, FRT40A* animals. We dissected 24 hr APF pupae and stained these with rabbit anti-GFP (Molecular Probes), rat anti-Elav Developmental Studies Hybridoma Bank, DSHB), mouse anti-Prospero (DSHB), rat anti-Suppressor of Hairless (gift of Francois Schweisguth), rabbit anti-Numb (gift of Yuh Nung Jan), rabbit anti-Lgl (gift of Scott Goode), followed by Alexa-coupled secondary antibodies (Molecular Probes). Following the determination that *insv* chromosomes harbored *lgl*, we performed rescue tests in *Ubx-FLP/+; tub-Gal80, FRT40A/lgl, insv [23B], FRT40A; neur-Gal4, UAS-lgl-GFP* (or *UAS-Histone2B-RFP*) animals.

**TABLE S1****Complementation tests of the DK2 Bloomington Deficiency Kit with *lgI[4]***

| stock name |      | Df name         | single fly cross to <i>lgI[4]</i> | complements <i>lgI[4]</i> ? |
|------------|------|-----------------|-----------------------------------|-----------------------------|
| DK2-1      | 3638 | Df(2L)net-PMF   | 1                                 | yes                         |
|            |      |                 | 2                                 | yes                         |
| DK2-2      | 6283 | Df(2L)BSC4      | 1                                 | yes                         |
|            |      |                 | 2                                 | yes                         |
| DK2-3      | 8672 | Df(2L)BSC106    | 1                                 | yes                         |
|            |      |                 | 2                                 | yes                         |
| DK2-4      | 6608 | Df(2L)BSC16     | 1                                 | yes                         |
|            |      |                 | 2                                 | yes                         |
| DK2-5      | 3084 | Df(2L)ast2      | 1                                 | yes                         |
|            |      |                 | 2                                 | yes                         |
| DK2-7      | 7144 | Df(2L)BSC37     | 1                                 | yes                         |
|            |      |                 | 2                                 | yes                         |
| DK2-8      | 6648 | Df(2L)dpp[d14]  | 1                                 | yes                         |
|            |      |                 | 2                                 | yes                         |
| DK2-9      | 90   | Df(2L)C144      | 1                                 | yes                         |
|            |      |                 | 2                                 | yes                         |
| DK2-10     | 1567 | Df(2L)JS17      | 1                                 | yes                         |
|            |      |                 | 2                                 | yes                         |
| DK2-11     | 6875 | Df(2L)BSC28     | 1                                 | yes                         |
|            |      |                 | 2                                 | yes                         |
| DK2-12     | 6965 | Df(2L)BSC31     | 1                                 | yes                         |
|            |      |                 | 2                                 | yes                         |
| DK2-13     | 6507 | Df(2L)drm-P2    | 1                                 | yes                         |
|            |      |                 | 2                                 | yes                         |
| DK2-14     | 5330 | Df(2L)ed1       | 1                                 | yes                         |
|            |      |                 | 2                                 | yes                         |
| DK2-15     | 693  | Df(2L)sc19-8    | 1                                 | yes                         |
|            |      |                 | 2                                 | yes                         |
| DK2-16     | 9270 | Df(2L)ED250     | 1                                 | yes                         |
|            |      |                 | 2                                 | yes                         |
| DK2-17     | 8835 | Df(2L)BSC110    | 1                                 | yes                         |
|            |      |                 | 2                                 | yes                         |
| DK2-18     | 8674 | Df(2L)BSC109    | 1                                 | yes                         |
|            |      |                 | 2                                 | yes                         |
| DK2-19     | 7497 | Df(2L)Exel6011  | 1                                 | yes                         |
|            |      |                 | 2                                 | yes                         |
| DK2-20     | 781  | Df(2L)cl-h3     | 1                                 | yes                         |
|            |      |                 | 2                                 | yes                         |
| DK2-21     | 490  | Df(2L)E110      | 1                                 | yes                         |
|            |      |                 | 2                                 | yes                         |
| DK2-22     | 6299 | Df(2L)BSC5      | 1                                 | yes                         |
|            |      |                 | 2                                 | yes                         |
| DK2-23     | 6338 | Df(2L)BSC6      | 1                                 | yes                         |
|            |      |                 | 2                                 | yes                         |
| DK2-24     | 6374 | Df(2L)BSC7      | 1                                 | yes                         |
|            |      |                 | 2                                 | yes                         |
| DK2-25     | 2414 | Df(2L)spd[j2]   | 1                                 | yes                         |
|            |      |                 | 2                                 | yes                         |
| DK2-26     | 5420 | Df(2L)Dwee1-W05 | 1                                 | yes                         |
|            |      |                 | 2                                 | yes                         |
| DK2-27     | 4956 | Df(2L)XE-3801   | 1                                 | yes                         |
|            |      |                 | 2                                 | yes                         |
| DK2-28     | 7147 | Df(2L)BSC41     | 1                                 | yes                         |

|        |      |                      |   |     |
|--------|------|----------------------|---|-----|
|        |      |                      | 2 | yes |
| DK2-29 | 9502 | Df(2L)BSC142         | 1 | yes |
|        |      |                      | 2 | yes |
| DK2-30 | 140  | Df(2L)Trf-C6R31      | 1 | yes |
|        |      |                      | 2 | yes |
| DK2-31 | 179  | Df(2L)TE29Aa-11      | 1 | yes |
|        |      |                      | 2 | yes |
| DK2-32 | 8836 | Df(2L)BSC111         | 1 | yes |
|        |      |                      | 2 | yes |
| DK2-33 | 9298 | Df(2L)ED611          | 1 | yes |
|        |      |                      | 2 | yes |
| DK2-34 | 2892 | Df(2L)N22-14         | 1 | no  |
|        |      |                      | 2 | no  |
| DK2-35 | 6478 | Df(2L)BSC17          | 1 | yes |
|        |      |                      | 2 | yes |
| DK2-36 | 1045 | Df(2L)Mdh            | 1 | yes |
|        |      |                      | 2 | yes |
| DK2-37 | 8469 | Df(2L)BSC50          | 1 | yes |
|        |      |                      | 2 | yes |
| DK2-38 | 3366 | Df(2L)J2             | 1 | yes |
|        |      |                      | 2 | yes |
| DK2-39 | 9503 | Df(2L)BSC143         | 1 | no  |
|        |      |                      | 2 | no  |
| DK2-40 | 7142 | Df(2L)BSC32          | 1 | yes |
|        |      |                      | 2 | yes |
| DK2-41 | 9505 | Df(2L)BSC145         | 1 | yes |
|        |      |                      | 2 | yes |
| DK2-42 | 7143 | Df(2L)BSC36          | 1 | yes |
|        |      |                      | 2 | yes |
| DK2-43 | 5869 | Df(2L)FCK-20         | 1 | yes |
|        |      |                      | 2 | yes |
| DK2-44 | 3079 | Df(2L)Prl            | 1 | no  |
|        |      |                      | 2 | no  |
| DK2-45 | 6999 | Df(2L)BSC30          | 1 | no  |
|        |      |                      | 2 | no  |
| DK2-47 | 3138 | Df(2L)b87e25         | 1 | no  |
|        |      |                      | 2 | no  |
| DK2-48 | 9506 | Df(2L)BSC147         | 1 | yes |
|        |      |                      | 2 | yes |
| DK2-49 | 3588 | Df(2L)TE35BC-24      | 1 | yes |
|        |      |                      | 2 | yes |
| DK2-50 | 1491 | Df(2L)r10            | 1 | yes |
|        |      |                      | 2 | yes |
| DK2-51 | 2583 | Df(2L)cact-255rv64   | 1 | no  |
|        |      |                      | 2 | no  |
| DK2-52 | 420  | Df(2L)TW137          | 1 | yes |
|        |      |                      | 2 | yes |
| DK2-53 | 567  | Df(2L)pr-A16         | 1 | yes |
|        |      |                      | 2 | yes |
| DK2-54 | 167  | Df(2L)TW161          | 1 | yes |
|        |      |                      | 2 | yes |
| DK2-55 | 7531 | Df(2L)Exel6049       | 1 | yes |
|        |      |                      | 2 | yes |
| DK2-56 | 9510 | Df(2L)BSC151         | 1 | yes |
|        |      |                      | 2 | yes |
| DK2-57 | 4959 | Df(2L)C'             | 1 | yes |
|        |      |                      | 2 | yes |
| DK2-58 | 749  | In(2R)bw[VDe2L]Cy[R] | 1 | yes |

|        |      |                 |   |     |
|--------|------|-----------------|---|-----|
| DK2-59 | 739  | Df(2R)M41A4     | 2 | yes |
|        |      |                 | 1 | yes |
| DK2-60 | 1007 | Df(2R)nap9      | 2 | yes |
|        |      |                 | 1 | yes |
|        |      |                 | 2 | yes |
| DK2-61 | 1888 | Df(2R)ST1       | 1 | no  |
|        |      |                 | 2 | no  |
| DK2-62 | 3368 | Df(2R)cn9       | 1 | no  |
|        |      |                 | 2 | no  |
| DK2-63 | 198  | Df(2R)H3C1      | 1 | yes |
|        |      |                 | 2 | yes |
| DK2-65 | 3591 | Df(2R)Np5       | 1 | yes |
|        |      |                 | 2 | yes |
| DK2-66 | 4966 | Df(2R)w45-30n   | 1 | yes |
|        |      |                 | 2 | yes |
| DK2-67 | 6917 | Df(2R)BSC29     | 1 | yes |
|        |      |                 | 2 | yes |
| DK2-69 | 1743 | Df(2R)B5        | 1 | yes |
|        |      |                 | 2 | yes |
| DK2-70 | 1702 | Df(2R)X1        | 1 | yes |
|        |      |                 | 2 | yes |
| DK2-71 | 190  | Df(2R)en-A      | 1 | no  |
|        |      |                 | 2 | no  |
| DK2-72 | 1145 | Df(2R)en30      | 1 | yes |
|        |      |                 | 2 | yes |
| DK2-73 | 7145 | Df(2R)BSC39     | 1 | yes |
|        |      |                 | 2 | yes |
| DK2-74 | 4960 | Df(2R)CB21      | 1 | no  |
|        |      |                 | 2 | no  |
| DK2-75 | 7146 | Df(2R)BSC40     | 1 | yes |
|        |      |                 | 2 | yes |
| DK2-76 | 5879 | Df(2R)BSC3      | 1 | yes |
|        |      |                 | 2 | yes |
| DK2-77 | 754  | Df(2R)vg-C      | 1 | yes |
|        |      |                 | 2 | yes |
| DK2-80 | 7875 | Df(2R)Exel7130  | 1 | yes |
|        |      |                 | 2 | yes |
| DK2-81 | 9496 | Df(2R)BSC134    | 1 | no  |
|        |      |                 | 2 | no  |
| DK2-82 | 7876 | Df(2R)Exel7131  | 1 | yes |
|        |      |                 | 2 | yes |
| DK2-85 | 3520 | Df(2R)Jp8       | 1 | yes |
|        |      |                 | 2 | yes |
| DK2-86 | 7445 | Df(2R)BSC49     | 1 | yes |
|        |      |                 | 2 | yes |
| DK2-87 | 7414 | Df(2R)BSC44     | 1 | yes |
|        |      |                 | 2 | yes |
| DK2-88 | 9596 | Df(2R)BSC161    | 1 | yes |
|        |      |                 | 2 | yes |
| DK2-90 | 5574 | Df(2R)k10408    | 1 | yes |
|        |      |                 | 2 | yes |
| DK2-91 | 7441 | Df(2R)BSC45     | 1 | yes |
|        |      |                 | 2 | yes |
| DK2-92 | 6779 | Df(2R)14H10Y-53 | 1 | yes |
|        |      |                 | 2 | yes |
| DK2-93 | 6780 | Df(2R)14H10W-35 | 1 | yes |
|        |      |                 | 2 | yes |
| DK2-94 | 1547 | Df(2R)PC4       | 1 | yes |

|         |      |                |   |     |
|---------|------|----------------|---|-----|
|         |      |                | 2 | yes |
| DK2-95  | 757  | Df(2R)P34      | 1 | no  |
|         |      |                | 2 | no  |
| DK2-96  | 6866 | Df(2R)BSC26    | 1 | no  |
|         |      |                | 2 | no  |
| DK2-97  | 6647 | Df(2R)BSC22    | 1 | yes |
|         |      |                | 2 | yes |
| DK2-98  | 3467 | Df(2R)AA21     | 1 | yes |
|         |      |                | 2 | yes |
| DK2-99  | 7896 | Df(2R)Exel7162 | 1 | yes |
|         |      |                | 2 | yes |
| DK2-100 | 6609 | Df(2R)BSC19    | 1 | yes |
|         |      |                | 2 | yes |
| DK2-101 | 5246 | Df(2R)Egfr5    | 1 | yes |
|         |      |                | 2 | yes |
| DK2-103 | 3909 | Df(2R)59AD     | 1 | yes |
|         |      |                | 2 | yes |
| DK2-104 | 7273 | Df(2R)vir130   | 1 | yes |
|         |      |                | 2 | yes |
| DK2-106 | 9691 | Df(2R)BSC155   | 1 | yes |
|         |      |                | 2 | yes |
| DK2-107 | 2604 | Df(2R)Px2      | 1 | yes |
|         |      |                | 2 | yes |
| DK2-108 | 9069 | Df(2R)ED4065   | 1 | yes |
|         |      |                | 2 | yes |
| DK2-110 | 4961 | Df(2R)Kr10     | 1 | yes |
|         |      |                | 2 | yes |

Two male flies were individually tested from each stock. For stocks that failed to complement *lgl*, an additional single fly cross was performed as confirmation.

**TABLE S2****Complementation tests of 24 randomly selected FRT40A Bruinfly lines with *lgl*[4]**

| Kyoto ID | Bruinfly ID | insertion site              | annotated gene disrupted       | single fly crosses that fail to complement <i>lgl</i> [4] |
|----------|-------------|-----------------------------|--------------------------------|-----------------------------------------------------------|
| 111624   | 14733       | 023E01_                     | CG3347                         | 0 of 8                                                    |
| 111512   | 13053       | 35D04                       | gliotactin                     | 10 of 10                                                  |
| 111516   | 13097       | 026B05                      | Kruppel homolog 1              | 10 of 10                                                  |
| 111066   | 20404       | 035F01                      | Cropped                        | 0 of 4                                                    |
| 111067   | 10363       | 029E04-029E06               | raw                            | 0 of 4                                                    |
| 111079   | 10386       | 033A01-033A02               | crooked legs                   | 0 of 4                                                    |
| 111083   | 10391       | 038B03-038B05               | nebbish                        | 0 of 4                                                    |
| 111097   | 10435       | 031D01                      | no mitochondrial derivative    | 0 of 4                                                    |
| 111106   | 10451       | 024E01_                     | turtle                         | 5 of 10                                                   |
| 111108   | 10453       | 030A02-030A06               | taiman                         | 0 of 4                                                    |
| 111111   | 10457       | 023B06                      | overgrown hematopoietic organs | 0 of 4                                                    |
| 111122   | 10473       | 025C01                      | viking                         | 0 of 10                                                   |
| 111275   | 10959       | 022C01                      | CG31672                        | 0 of 4                                                    |
| 111278   | 10965       | 023F03                      | Pdsw                           | 0 of 4                                                    |
| 111334   | 11115       | 036A11                      | cytochrome C proximal          | 0 of 4                                                    |
| 111356   | 11166       | 021C02                      | ebi                            | 0 of 4                                                    |
| 111366   | 11212       | 024C05                      | lethal (2) k16918              | 0 of 4                                                    |
| 111369   | 11218       | 034A04                      | Target of rapamycin            | 0 of 4                                                    |
| 111429   | 12169       | 021E02_                     | dribble                        | 0 of 4                                                    |
| 111431   | 12173       | 035B08                      | moladietz                      | 0 of 4                                                    |
| 111462   | 12309       | 033A01-033A02               | unknown                        | 0 of 4                                                    |
| 111463   | 12310       | 023D01-023D02,029A03-029A05 | unknown                        | 0 of 4                                                    |
| 111558   | 13692       | 032F02                      | CG6509                         | 7 of 10                                                   |
| 111564   | 13853       | 038A01                      | Lar leukocyte antigen related  | 8 of 8                                                    |

Initially, 4-6 male flies were individually tested from each stock. For stocks that exhibited some failure to complement *lgl*, additional single fly crosses were performed to assay a total of 10 chromosomes from each stock. The gliotactin, Kr-H1, and Lar insertions were 100% *lgl*, whereas the turtle and CG6509 insertions were 50-70% *lgl*.
