# Supplementary material for: Frequent Unanticipated Alleles of lethal giant larvae in Drosophila Second Chromosome Stocks
Source: Oxford University Press journal article supplement (doi:10.1534/genetics.109.101808), 2009-03-12
Supplement: tables1.doc [file tables1.doc]

**TABLE S1**

Complementation tests of the DK2 Bloomington Deficiency Kit with lgl[4]

| stock name |  | Df name | single fly cross to lgl[4] | complements lgl[4]? |
| --- | --- | --- | --- | --- |
| DK2-1 | [3638](http://flystocks.bio.indiana.edu/Reports/3638.html) | [Df(2L)net-PMF](http://flybase.org/.bin/fbidq.html?FBab0001854) | 1 | yes |
|  |  |  | 2 | yes |
| DK2-2 | [6283](http://flystocks.bio.indiana.edu/Reports/6283.html) | [Df(2L)BSC4](http://flybase.org/.bin/fbidq.html?FBab0029533) | 1 | yes |
|  |  |  | 2 | yes |
| DK2-3 | [8672](http://flystocks.bio.indiana.edu/Reports/8672.html) | [Df(2L)BSC106](http://flybase.org/.bin/fbidq.html?FBab0038756) | 1 | yes |
|  |  |  | 2 | yes |
| DK2-4 | [6608](http://flystocks.bio.indiana.edu/Reports/6608.html) | [Df(2L)BSC16](http://flybase.org/.bin/fbidq.html?FBab0029789) | 1 | yes |
|  |  |  | 2 | yes |
| DK2-5 | [3084](http://flystocks.bio.indiana.edu/Reports/3084.html) | [Df(2L)ast2](http://flybase.org/.bin/fbidq.html?FBab0001695) | 1 | yes |
|  |  |  | 2 | yes |
| DK2-7 | [7144](http://flystocks.bio.indiana.edu/Reports/7144.html) | [Df(2L)BSC37](http://flybase.org/.bin/fbidq.html?FBab0037634) | 1 | yes |
|  |  |  | 2 | yes |
| DK2-8 | [6648](http://flystocks.bio.indiana.edu/Reports/6648.html) | [Df(2L)dpp[d14]](http://flybase.org/.bin/fbidq.html?FBab0001786) | 1 | yes |
|  |  |  | 2 | yes |
| DK2-9 | [90](http://flystocks.bio.indiana.edu/Reports/90.html) | [Df(2L)C144](http://flybase.org/.bin/fbidq.html?FBab0022184) | 1 | yes |
|  |  |  | 2 | yes |
| DK2-10 | [1567](http://flystocks.bio.indiana.edu/Reports/1567.html) | [Df(2L)JS17](http://flybase.org/.bin/fbidq.html?FBab0022191) | 1 | yes |
|  |  |  | 2 | yes |
| DK2-11 | [6875](http://flystocks.bio.indiana.edu/Reports/6875.html) | [Df(2L)BSC28](http://flybase.org/.bin/fbidq.html?FBab0029867) | 1 | yes |
|  |  |  | 2 | yes |
| DK2-12 | [6965](http://flystocks.bio.indiana.edu/Reports/6965.html) | [Df(2L)BSC31](http://flybase.org/.bin/fbidq.html?FBab0029974) | 1 | yes |
|  |  |  | 2 | yes |
| DK2-13 | [6507](http://flystocks.bio.indiana.edu/Reports/6507.html) | [Df(2L)drm-P2](http://flybase.org/.bin/fbidq.html?FBab0029744) | 1 | yes |
|  |  |  | 2 | yes |
| DK2-14 | [5330](http://flystocks.bio.indiana.edu/Reports/5330.html) | [Df(2L)ed1](http://flybase.org/.bin/fbidq.html?FBab0001792) | 1 | yes |
|  |  |  | 2 | yes |
| DK2-15 | [693](http://flystocks.bio.indiana.edu/Reports/693.html) | [Df(2L)sc19-8](http://flybase.org/.bin/fbidq.html?FBab0001915) | 1 | yes |
|  |  |  | 2 | yes |
| DK2-16 | [9270](http://flystocks.bio.indiana.edu/Reports/9270.html) | [Df(2L)ED250](http://flybase.org/.bin/fbidq.html?FBab0031954) | 1 | yes |
|  |  |  | 2 | yes |
| DK2-17 | [8835](http://flystocks.bio.indiana.edu/Reports/8835.html) | [Df(2L)BSC110](http://flybase.org/.bin/fbidq.html?FBab0040372) | 1 | yes |
|  |  |  | 2 | yes |
| DK2-18 | [8674](http://flystocks.bio.indiana.edu/Reports/8674.html) | [Df(2L)BSC109](http://flybase.org/.bin/fbidq.html?FBab0038758) | 1 | yes |
|  |  |  | 2 | yes |
| DK2-19 | [7497](http://flystocks.bio.indiana.edu/Reports/7497.html) | [Df(2L)Exel6011](http://flybase.org/.bin/fbidq.html?FBab0037853) | 1 | yes |
|  |  |  | 2 | yes |
| DK2-20 | [781](http://flystocks.bio.indiana.edu/Reports/781.html) | [Df(2L)cl-h3](http://flybase.org/.bin/fbidq.html?FBab0001758) | 1 | yes |
|  |  |  | 2 | yes |
| DK2-21 | [490](http://flystocks.bio.indiana.edu/Reports/490.html) | [Df(2L)E110](http://flybase.org/.bin/fbidq.html?FBab0001456) | 1 | yes |
|  |  |  | 2 | yes |
| DK2-22 | [6299](http://flystocks.bio.indiana.edu/Reports/6299.html) | [Df(2L)BSC5](http://flybase.org/.bin/fbidq.html?FBab0029534) | 1 | yes |
|  |  |  | 2 | yes |
| DK2-23 | [6338](http://flystocks.bio.indiana.edu/Reports/6338.html) | [Df(2L)BSC6](http://flybase.org/.bin/fbidq.html?FBab0029632) | 1 | yes |
|  |  |  | 2 | yes |
| DK2-24 | [6374](http://flystocks.bio.indiana.edu/Reports/6374.html) | [Df(2L)BSC7](http://flybase.org/.bin/fbidq.html?FBab0029660) | 1 | yes |
|  |  |  | 2 | yes |
| DK2-25 | [2414](http://flystocks.bio.indiana.edu/Reports/2414.html) | [Df(2L)spd[j2]](http://flybase.org/.bin/fbidq.html?FBab0024845) | 1 | yes |
|  |  |  | 2 | yes |
| DK2-26 | [5420](http://flystocks.bio.indiana.edu/Reports/5420.html) | [Df(2L)Dwee1-W05](http://flybase.org/.bin/fbidq.html?FBab0026801) | 1 | yes |
|  |  |  | 2 | yes |
| DK2-27 | [4956](http://flystocks.bio.indiana.edu/Reports/4956.html) | [Df(2L)XE-3801](http://flybase.org/.bin/fbidq.html?FBab0024841) | 1 | yes |
|  |  |  | 2 | yes |
| DK2-28 | [7147](http://flystocks.bio.indiana.edu/Reports/7147.html) | [Df(2L)BSC41](http://flybase.org/.bin/fbidq.html?FBab0037635) | 1 | yes |
|  |  |  | 2 | yes |
| DK2-29 | [9502](http://flystocks.bio.indiana.edu/Reports/9502.html) | [Df(2L)BSC142](http://flybase.org/.bin/fbidq.html?) | 1 | yes |
|  |  |  | 2 | yes |
| DK2-30 | [140](http://flystocks.bio.indiana.edu/Reports/140.html) | [Df(2L)Trf-C6R31](http://flybase.org/.bin/fbidq.html?FBab0022203) | 1 | yes |
|  |  |  | 2 | yes |
| DK2-31 | [179](http://flystocks.bio.indiana.edu/Reports/179.html) | [Df(2L)TE29Aa-11](http://flybase.org/.bin/fbidq.html?FBab0001569) | 1 | yes |
|  |  |  | 2 | yes |
| DK2-32 | [8836](http://flystocks.bio.indiana.edu/Reports/8836.html) | [Df(2L)BSC111](http://flybase.org/.bin/fbidq.html?FBab0040373) | 1 | yes |
|  |  |  | 2 | yes |
| DK2-33 | [9298](http://flystocks.bio.indiana.edu/Reports/9298.html) | [Df(2L)ED611](http://flybase.org/.bin/fbidq.html?FBab0032338) | 1 | yes |
|  |  |  | 2 | yes |
| DK2-34 | [2892](http://flystocks.bio.indiana.edu/Reports/2892.html) | [Df(2L)N22-14](http://flybase.org/.bin/fbidq.html?FBab0022196) | 1 | no |
|  |  |  | 2 | no |
| DK2-35 | [6478](http://flystocks.bio.indiana.edu/Reports/6478.html) | [Df(2L)BSC17](http://flybase.org/.bin/fbidq.html?FBab0029725) | 1 | yes |
|  |  |  | 2 | yes |
| DK2-36 | [1045](http://flystocks.bio.indiana.edu/Reports/1045.html) | [Df(2L)Mdh](http://flybase.org/.bin/fbidq.html?FBab0001497) | 1 | yes |
|  |  |  | 2 | yes |
| DK2-37 | [8469](http://flystocks.bio.indiana.edu/Reports/8469.html) | [Df(2L)BSC50](http://flybase.org/.bin/fbidq.html?FBab0037839) | 1 | yes |
|  |  |  | 2 | yes |
| DK2-38 | [3366](http://flystocks.bio.indiana.edu/Reports/3366.html) | [Df(2L)J2](http://flybase.org/.bin/fbidq.html?FBab0001475) | 1 | yes |
|  |  |  | 2 | yes |
| DK2-39 | [9503](http://flystocks.bio.indiana.edu/Reports/9503.html) | [Df(2L)BSC143](http://flybase.org/.bin/fbidq.html?) | 1 | no |
|  |  |  | 2 | no |
| DK2-40 | [7142](http://flystocks.bio.indiana.edu/Reports/7142.html) | [Df(2L)BSC32](http://flybase.org/.bin/fbidq.html?FBab0031351) | 1 | yes |
|  |  |  | 2 | yes |
| DK2-41 | [9505](http://flystocks.bio.indiana.edu/Reports/9505.html) | [Df(2L)BSC145](http://flybase.org/.bin/fbidq.html?) | 1 | yes |
|  |  |  | 2 | yes |
| DK2-42 | [7143](http://flystocks.bio.indiana.edu/Reports/7143.html) | [Df(2L)BSC36](http://flybase.org/.bin/fbidq.html?FBab0031352) | 1 | yes |
|  |  |  | 2 | yes |
| DK2-43 | [5869](http://flystocks.bio.indiana.edu/Reports/5869.html) | [Df(2L)FCK-20](http://flybase.org/.bin/fbidq.html?FBab0028902) | 1 | yes |
|  |  |  | 2 | yes |
| DK2-44 | [3079](http://flystocks.bio.indiana.edu/Reports/3079.html) | [Df(2L)Prl](http://flybase.org/.bin/fbidq.html?FBab0001522) | 1 | no |
|  |  |  | 2 | no |
| DK2-45 | [6999](http://flystocks.bio.indiana.edu/Reports/6999.html) | [Df(2L)BSC30](http://flybase.org/.bin/fbidq.html?FBab0029975) | 1 | no |
|  |  |  | 2 | no |
| DK2-47 | [3138](http://flystocks.bio.indiana.edu/Reports/3138.html) | [Df(2L)b87e25](http://flybase.org/.bin/fbidq.html?FBab0001747) | 1 | no |
|  |  |  | 2 | no |
| DK2-48 | [9506](http://flystocks.bio.indiana.edu/Reports/9506.html) | [Df(2L)BSC147](http://flybase.org/.bin/fbidq.html?) | 1 | yes |
|  |  |  | 2 | yes |
| DK2-49 | [3588](http://flystocks.bio.indiana.edu/Reports/3588.html) | [Df(2L)TE35BC-24](http://flybase.org/.bin/fbidq.html?FBab0001606) | 1 | yes |
|  |  |  | 2 | yes |
| DK2-50 | [1491](http://flystocks.bio.indiana.edu/Reports/1491.html) | [Df(2L)r10](http://flybase.org/.bin/fbidq.html?FBab0001903) | 1 | yes |
|  |  |  | 2 | yes |
| DK2-51 | [2583](http://flystocks.bio.indiana.edu/Reports/2583.html) | [Df(2L)cact-255rv64](http://flybase.org/.bin/fbidq.html?FBab0022223) | 1 | no |
|  |  |  | 2 | no |
| DK2-52 | [420](http://flystocks.bio.indiana.edu/Reports/420.html) | [Df(2L)TW137](http://flybase.org/.bin/fbidq.html?FBab0001645) | 1 | yes |
|  |  |  | 2 | yes |
| DK2-53 | [567](http://flystocks.bio.indiana.edu/Reports/567.html) | [Df(2L)pr-A16](http://flybase.org/.bin/fbidq.html?FBab0001868) | 1 | yes |
|  |  |  | 2 | yes |
| DK2-54 | [167](http://flystocks.bio.indiana.edu/Reports/167.html) | [Df(2L)TW161](http://flybase.org/.bin/fbidq.html?FBab0001648) | 1 | yes |
|  |  |  | 2 | yes |
| DK2-55 | [7531](http://flystocks.bio.indiana.edu/Reports/7531.html) | [Df(2L)Exel6049](http://flybase.org/.bin/fbidq.html?FBab0037887) | 1 | yes |
|  |  |  | 2 | yes |
| DK2-56 | [9510](http://flystocks.bio.indiana.edu/Reports/9510.html) | [Df(2L)BSC151](http://flybase.org/.bin/fbidq.html?) | 1 | yes |
|  |  |  | 2 | yes |
| DK2-57 | [4959](http://flystocks.bio.indiana.edu/Reports/4959.html) | [Df(2L)C'](http://flybase.org/.bin/fbidq.html?FBab0001429) | 1 | yes |
|  |  |  | 2 | yes |
| DK2-58 | [749](http://flystocks.bio.indiana.edu/Reports/749.html) | [In(2R)bw[VDe2L]Cy[R]](http://flybase.org/.bin/fbidq.html?FBab0005116) | 1 | yes |
|  |  |  | 2 | yes |
| DK2-59 | [739](http://flystocks.bio.indiana.edu/Reports/739.html) | [Df(2R)M41A4](http://flybase.org/.bin/fbidq.html?FBab0001993) | 1 | yes |
|  |  |  | 2 | yes |
| DK2-60 | [1007](http://flystocks.bio.indiana.edu/Reports/1007.html) | [Df(2R)nap9](http://flybase.org/.bin/fbidq.html?FBab0002190) | 1 | yes |
|  |  |  | 2 | yes |
| DK2-61 | [1888](http://flystocks.bio.indiana.edu/Reports/1888.html) | [Df(2R)ST1](http://flybase.org/.bin/fbidq.html?FBab0002037) | 1 | no |
|  |  |  | 2 | no |
| DK2-62 | [3368](http://flystocks.bio.indiana.edu/Reports/3368.html) | [Df(2R)cn9](http://flybase.org/.bin/fbidq.html?FBab0002170) | 1 | no |
|  |  |  | 2 | no |
| DK2-63 | [198](http://flystocks.bio.indiana.edu/Reports/198.html) | [Df(2R)H3C1](http://flybase.org/.bin/fbidq.html?FBab0024375) | 1 | yes |
|  |  |  | 2 | yes |
| DK2-65 | [3591](http://flystocks.bio.indiana.edu/Reports/3591.html) | [Df(2R)Np5](http://flybase.org/.bin/fbidq.html?FBab0024011) | 1 | yes |
|  |  |  | 2 | yes |
| DK2-66 | [4966](http://flystocks.bio.indiana.edu/Reports/4966.html) | [Df(2R)w45-30n](http://flybase.org/.bin/fbidq.html?FBab0002275) | 1 | yes |
|  |  |  | 2 | yes |
| DK2-67 | [6917](http://flystocks.bio.indiana.edu/Reports/6917.html) | [Df(2R)BSC29](http://flybase.org/.bin/fbidq.html?FBab0029979) | 1 | yes |
|  |  |  | 2 | yes |
| DK2-69 | [1743](http://flystocks.bio.indiana.edu/Reports/1743.html) | [Df(2R)B5](http://flybase.org/.bin/fbidq.html?FBab0010225) | 1 | yes |
|  |  |  | 2 | yes |
| DK2-70 | [1702](http://flystocks.bio.indiana.edu/Reports/1702.html) | [Df(2R)X1](http://flybase.org/.bin/fbidq.html?FBab0002048) | 1 | yes |
|  |  |  | 2 | yes |
| DK2-71 | [190](http://flystocks.bio.indiana.edu/Reports/190.html) | [Df(2R)en-A](http://flybase.org/.bin/fbidq.html?FBab0002173) | 1 | no |
|  |  |  | 2 | no |
| DK2-72 | [1145](http://flystocks.bio.indiana.edu/Reports/1145.html) | [Df(2R)en30](http://flybase.org/.bin/fbidq.html?FBab0002176) | 1 | yes |
|  |  |  | 2 | yes |
| DK2-73 | [7145](http://flystocks.bio.indiana.edu/Reports/7145.html) | [Df(2R)BSC39](http://flybase.org/.bin/fbidq.html?FBab0037639) | 1 | yes |
|  |  |  | 2 | yes |
| DK2-74 | [4960](http://flystocks.bio.indiana.edu/Reports/4960.html) | [Df(2R)CB21](http://flybase.org/.bin/fbidq.html?FBab0024848) | 1 | no |
|  |  |  | 2 | no |
| DK2-75 | [7146](http://flystocks.bio.indiana.edu/Reports/7146.html) | [Df(2R)BSC40](http://flybase.org/.bin/fbidq.html?FBab0037640) | 1 | yes |
|  |  |  | 2 | yes |
| DK2-76 | [5879](http://flystocks.bio.indiana.edu/Reports/5879.html) | [Df(2R)BSC3](http://flybase.org/.bin/fbidq.html?FBab0029423) | 1 | yes |
|  |  |  | 2 | yes |
| DK2-77 | [754](http://flystocks.bio.indiana.edu/Reports/754.html) | [Df(2R)vg-C](http://flybase.org/.bin/fbidq.html?FBab0002234) | 1 | yes |
|  |  |  | 2 | yes |
| DK2-80 | [7875](http://flystocks.bio.indiana.edu/Reports/7875.html) | [Df(2R)Exel7130](http://flybase.org/.bin/fbidq.html?FBab0038037) | 1 | yes |
|  |  |  | 2 | yes |
| DK2-81 | [9496](http://flystocks.bio.indiana.edu/Reports/9496.html) | [Df(2R)BSC134](http://flybase.org/.bin/fbidq.html?) | 1 | no |
|  |  |  | 2 | no |
| DK2-82 | [7876](http://flystocks.bio.indiana.edu/Reports/7876.html) | [Df(2R)Exel7131](http://flybase.org/.bin/fbidq.html?FBab0038038) | 1 | yes |
|  |  |  | 2 | yes |
| DK2-85 | [3520](http://flystocks.bio.indiana.edu/Reports/3520.html) | [Df(2R)Jp8](http://flybase.org/.bin/fbidq.html?FBab0001974) | 1 | yes |
|  |  |  | 2 | yes |
| DK2-86 | [7445](http://flystocks.bio.indiana.edu/Reports/7445.html) | [Df(2R)BSC49](http://flybase.org/.bin/fbidq.html?FBab0037746) | 1 | yes |
|  |  |  | 2 | yes |
| DK2-87 | [7414](http://flystocks.bio.indiana.edu/Reports/7414.html) | [Df(2R)BSC44](http://flybase.org/.bin/fbidq.html?FBab0037744) | 1 | yes |
|  |  |  | 2 | yes |
| DK2-88 | [9596](http://flystocks.bio.indiana.edu/Reports/9596.html) | [Df(2R)BSC161](http://flybase.org/.bin/fbidq.html?) | 1 | yes |
|  |  |  | 2 | yes |
| DK2-90 | [5574](http://flystocks.bio.indiana.edu/Reports/5574.html) | [Df(2R)k10408](http://flybase.org/.bin/fbidq.html?FBab0028916) | 1 | yes |
|  |  |  | 2 | yes |
| DK2-91 | [7441](http://flystocks.bio.indiana.edu/Reports/7441.html) | [Df(2R)BSC45](http://flybase.org/.bin/fbidq.html?FBab0037745) | 1 | yes |
|  |  |  | 2 | yes |
| DK2-92 | [6779](http://flystocks.bio.indiana.edu/Reports/6779.html) | [Df(2R)14H10Y-53](http://flybase.org/.bin/fbidq.html?FBab0029942) | 1 | yes |
|  |  |  | 2 | yes |
| DK2-93 | [6780](http://flystocks.bio.indiana.edu/Reports/6780.html) | [Df(2R)14H10W-35](http://flybase.org/.bin/fbidq.html?FBab0029927) | 1 | yes |
|  |  |  | 2 | yes |
| DK2-94 | [1547](http://flystocks.bio.indiana.edu/Reports/1547.html) | [Df(2R)PC4](http://flybase.org/.bin/fbidq.html?FBab0002014) | 1 | yes |
|  |  |  | 2 | yes |
| DK2-95 | [757](http://flystocks.bio.indiana.edu/Reports/757.html) | [Df(2R)P34](http://flybase.org/.bin/fbidq.html?FBab0002011) | 1 | no |
|  |  |  | 2 | no |
| DK2-96 | [6866](http://flystocks.bio.indiana.edu/Reports/6866.html) | [Df(2R)BSC26](http://flybase.org/.bin/fbidq.html?FBab0029945) | 1 | no |
|  |  |  | 2 | no |
| DK2-97 | [6647](http://flystocks.bio.indiana.edu/Reports/6647.html) | [Df(2R)BSC22](http://flybase.org/.bin/fbidq.html?FBab0029834) | 1 | yes |
|  |  |  | 2 | yes |
| DK2-98 | [3467](http://flystocks.bio.indiana.edu/Reports/3467.html) | [Df(2R)AA21](http://flybase.org/.bin/fbidq.html?FBab0004927) | 1 | yes |
|  |  |  | 2 | yes |
| DK2-99 | [7896](http://flystocks.bio.indiana.edu/Reports/7896.html) | [Df(2R)Exel7162](http://flybase.org/.bin/fbidq.html?FBab0038054) | 1 | yes |
|  |  |  | 2 | yes |
| DK2-100 | [6609](http://flystocks.bio.indiana.edu/Reports/6609.html) | [Df(2R)BSC19](http://flybase.org/.bin/fbidq.html?FBab0029795) | 1 | yes |
|  |  |  | 2 | yes |
| DK2-101 | [5246](http://flystocks.bio.indiana.edu/Reports/5246.html) | [Df(2R)Egfr5](http://flybase.org/.bin/fbidq.html?FBab0001960) | 1 | yes |
|  |  |  | 2 | yes |
| DK2-103 | [3909](http://flystocks.bio.indiana.edu/Reports/3909.html) | [Df(2R)59AD](http://flybase.org/.bin/fbidq.html?FBab0022239) | 1 | yes |
|  |  |  | 2 | yes |
| DK2-104 | [7273](http://flystocks.bio.indiana.edu/Reports/7273.html) | [Df(2R)vir130](http://flybase.org/.bin/fbidq.html?FBab0024859) | 1 | yes |
|  |  |  | 2 | yes |
| DK2-106 | [9691](http://flystocks.bio.indiana.edu/Reports/9691.html) | [Df(2R)BSC155](http://flybase.org/.bin/fbidq.html?) | 1 | yes |
|  |  |  | 2 | yes |
| DK2-107 | [2604](http://flystocks.bio.indiana.edu/Reports/2604.html) | [Df(2R)Px2](http://flybase.org/.bin/fbidq.html?FBab0002027) | 1 | yes |
|  |  |  | 2 | yes |
| DK2-108 | [9069](http://flystocks.bio.indiana.edu/Reports/9069.html) | [Df(2R)ED4065](http://flybase.org/.bin/fbidq.html?FBab0035310) | 1 | yes |
|  |  |  | 2 | yes |
| DK2-110 | [4961](http://flystocks.bio.indiana.edu/Reports/4961.html) | [Df(2R)Kr10](http://flybase.org/.bin/fbidq.html?FBab0001981) | 1 | yes |
|  |  |  | 2 | yes |

Two male flies were individually tested from each stock. For stocks that failed to complement lgl, an additional single fly cross was performed as confirmation.
