# Supplementary material for: Frequent Unanticipated Alleles of lethal giant larvae in Drosophila Second Chromosome Stocks
Source: Oxford University Press journal article supplement (doi:10.1534/genetics.109.101808), 2009-03-12
Supplement: tables2.pdf [file tables2.pdf]

**TABLE S2****Complementation tests of 24 randomly selected FRT40A Bruinfly lines with *lgl*[4]**

| Kyoto ID | Bruinfly ID | insertion site              | annotated gene disrupted       | single fly crosses that fail to complement <i>lgl</i> [4] |
|----------|-------------|-----------------------------|--------------------------------|-----------------------------------------------------------|
| 111624   | 14733       | 023E01_                     | CG3347                         | 0 of 8                                                    |
| 111512   | 13053       | 35D04                       | gliotactin                     | 10 of 10                                                  |
| 111516   | 13097       | 026B05                      | Kruppel homolog 1              | 10 of 10                                                  |
| 111066   | 20404       | 035F01                      | Cropped                        | 0 of 4                                                    |
| 111067   | 10363       | 029E04-029E06               | raw                            | 0 of 4                                                    |
| 111079   | 10386       | 033A01-033A02               | crooked legs                   | 0 of 4                                                    |
| 111083   | 10391       | 038B03-038B05               | nebbish                        | 0 of 4                                                    |
| 111097   | 10435       | 031D01                      | no mitochondrial derivative    | 0 of 4                                                    |
| 111106   | 10451       | 024E01_                     | turtle                         | 5 of 10                                                   |
| 111108   | 10453       | 030A02-030A06               | taiman                         | 0 of 4                                                    |
| 111111   | 10457       | 023B06                      | overgrown hematopoietic organs | 0 of 4                                                    |
| 111122   | 10473       | 025C01                      | viking                         | 0 of 10                                                   |
| 111275   | 10959       | 022C01                      | CG31672                        | 0 of 4                                                    |
| 111278   | 10965       | 023F03                      | Pdsw                           | 0 of 4                                                    |
| 111334   | 11115       | 036A11                      | cytochrome C proximal          | 0 of 4                                                    |
| 111356   | 11166       | 021C02                      | ebi                            | 0 of 4                                                    |
| 111366   | 11212       | 024C05                      | lethal (2) k16918              | 0 of 4                                                    |
| 111369   | 11218       | 034A04                      | Target of rapamycin            | 0 of 4                                                    |
| 111429   | 12169       | 021E02_                     | dribble                        | 0 of 4                                                    |
| 111431   | 12173       | 035B08                      | moladietz                      | 0 of 4                                                    |
| 111462   | 12309       | 033A01-033A02               | unknown                        | 0 of 4                                                    |
| 111463   | 12310       | 023D01-023D02,029A03-029A05 | unknown                        | 0 of 4                                                    |
| 111558   | 13692       | 032F02                      | CG6509                         | 7 of 10                                                   |
| 111564   | 13853       | 038A01                      | Lar leukocyte antigen related  | 8 of 8                                                    |

Initially, 4-6 male flies were individually tested from each stock. For stocks that exhibited some failure to complement *lgl*, additional single fly crosses were performed to assay a total of 10 chromosomes from each stock. The gliotactin, Kr-H1, and Lar insertions were 100% *lgl*, whereas the turtle and CG6509 insertions were 50-70% *lgl*.
